USMLE step 2 clinical skills (CS) examination. *Med Teach* 2008; 30:325–7

4. Cohen J: *Statistical Power Analysis for the Behavioral Sciences*, 2nd edition. Hillsdale, Lawrence Erlbaum, 1988
5. Zhou Y, Sun H, Culley DJ, Young A, Harman AE, Warner DO: Effectiveness of written and oral specialty

certification examinations to predict actions against the medical licenses of anesthesiologists. *ANESTHESIOLOGY* 2017; 126:1171–9

6. Teirstein PS, Topol EJ: The role of maintenance of certification programs in governance and professionalism. *JAMA* 2015; 313:1809–10

## ANESTHESIOLOGY REFLECTIONS FROM THE WOOD LIBRARY-MUSEUM

### Dr. Brown Doubles Down: A With-and-without Trade Card for Laughing Gas Anesthesia

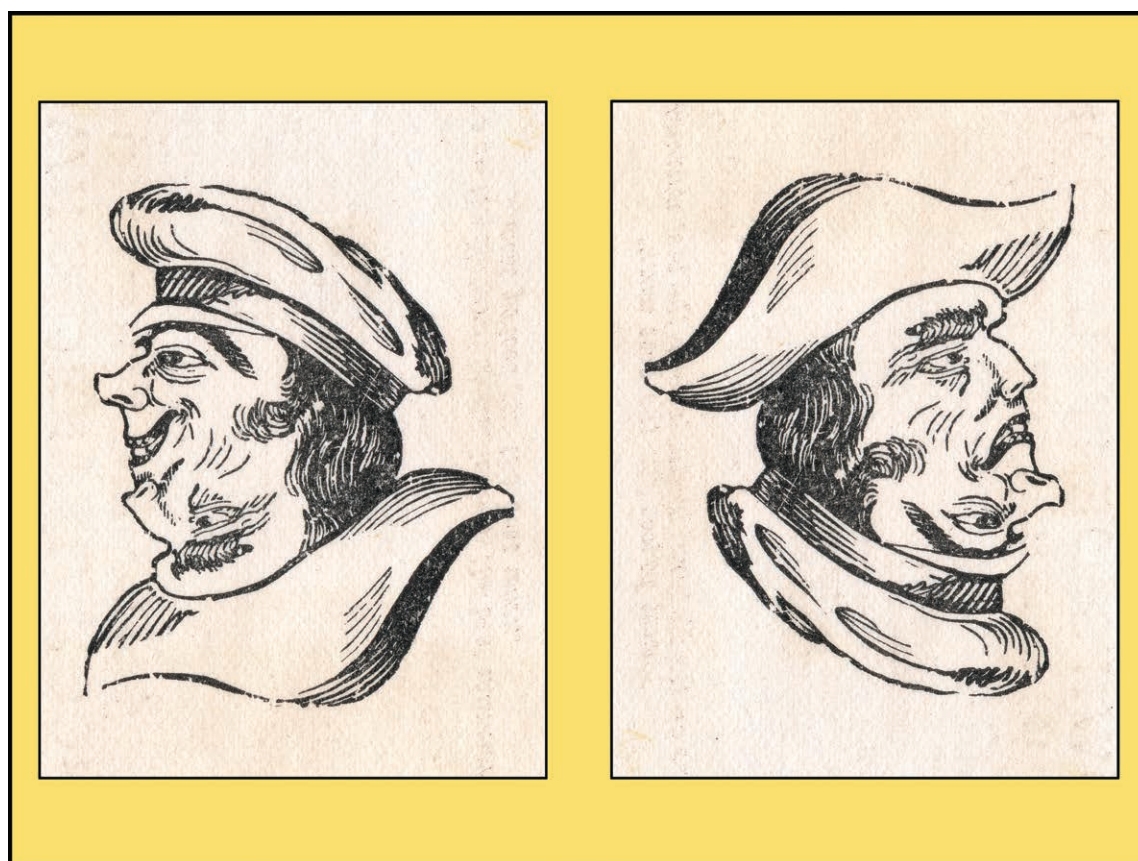

From the Wood Library-Museum's Ben Z. Swanson Collection, the lone image from the obverse of this c. 1892 trade card for Brown's Dental Rooms featured a happy visage (*left*) in one direction which, by optical illusion, appears to transform into an unhappy face (*right*) from the reverse angle. This "upside-down style of with-and-without card" contrasts patient satisfaction with or without nitrous oxide anesthesia for dental extraction. With his ski-jump nose, bell crown cap, and WITH nitrous oxide, the smiling patient (*left*) rejoices, "I took Laughing Gas...and had my Teeth Extracted without pain!" With his Roman nose and tricorn hat (*right*) but WITHOUT nitrous oxide, the frowning patient laments, "I didn't but wish I had!" According to the reverse of this trade card from Waterbury, Connecticut, anesthesia with laughing gas doubled the baseline 25-cent cost of dental extraction. (Copyright © the American Society of Anesthesiologists' Wood Library-Museum of Anesthesiology.)

George S. Bause, M.D., M.P.H., *Honorary Curator and Laureate of the History of Anesthesia, Wood Library-Museum of Anesthesiology, Schaumburg, Illinois, and Clinical Associate Professor, Case Western Reserve University, Cleveland, Ohio.* UJYC@aol.com.
